# Supplementary material for: An engineered autotransporter-based surface expression vector enables efficient display of Affibody molecules on OmpT-negative E. coli as well as protease-mediated secretion in OmpT-positive strains
Source: PubMed Central journal article supplement (PMC4304625; doi:10.1186/s12934-014-0179-z), 2014-12-30
Supplement: 12934_2014_179_MOESM1_ESM.pdf [file 12934_2014_179_MOESM1_ESM.pdf]

**Additional file 2: Table S1. Properties of the evaluated promoters and vectors**

| Promoter               | Vector backbone | Inductor    | Size (bp) | Selection marker | Copy # | Comment                                                                                         |
|------------------------|-----------------|-------------|-----------|------------------|--------|-------------------------------------------------------------------------------------------------|
| <i>aida</i> promoter   | pMK90           | NA          | 5521      | Ampicillin       | Low    | Constitutively expressed Native promoter for AIDA-I                                             |
| <i>T7</i> promoter     | pET-26B         | IPTG        | 7694      | Kanamycin        | High   | High expression level Conventional promoter                                                     |
| <i>RhaBAD</i> promoter | pRha811         | L-rhamnose  | 7230      | Kanamycin        | High   | Tightly regulated Fine-tuned expression using both repressive D-glucose and inducing L-rhamnose |
| <i>AraBAD</i> promoter | pBAD33          | L-arabinose | 7890      | Chloramphenicol  | Low    | Tightly regulated Low basal expression                                                          |
