# Supplementary material for: An engineered autotransporter-based surface expression vector enables efficient display of Affibody molecules on OmpT-negative E. coli as well as protease-mediated secretion in OmpT-positive strains
Source: PubMed Central journal article supplement (PMC4304625; doi:10.1186/s12934-014-0179-z), 2014-12-30

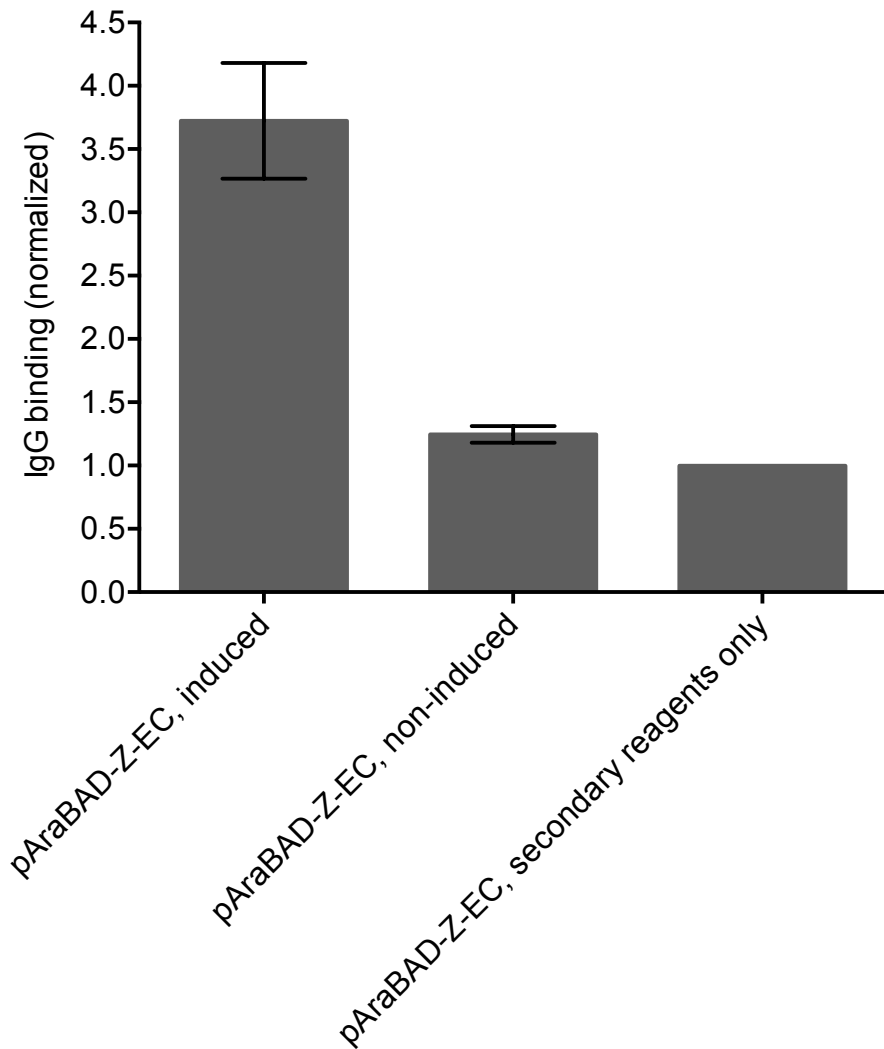

Supplement: 12934_2014_179_MOESM4_ESM.pdf [file 12934_2014_179_MOESM4_ESM.pdf]
